# Supplementary material for: Hollow silica nanostructures with small size Au nanoparticles for catalytic applications
Source: Royal Society of Chemistry journal article supplement (doi:10.1039/c6ra11366d), 2016-01-01
Supplement: c6ra11366d1.pdf [file c6ra11366d1.pdf]

Electronic Supplementary Information (ESI) for

## Hollow Silica Nanostructures with Small Sizes of Au Nanoparticles for Catalytic Applications

Lin Yao, Jong-Min Lee\*

School of Chemical and Biomedical Engineering, Nanyang Technological University, 637459, Singapore.

E-mail: jmlee@ntu.edu.sg;

### Materials and Methods

All materials were used without further purification. Tetrachloroauric(III) acid( $\text{HAuCl}_4 \cdot x\text{H}_2\text{O}$ ), Sodium borohydride( $\text{NaBH}_4$ ), 1,3,5-trimethylbenzene (TMB, 98%), (3-aminopropyl) trimethoxysilane (APTMS), tetraethyl orthosilicate (TEOS), and hexadecyltrimethylammonium bromide (CTAB, 99%) were purchased from Sigma Aldrich. Copper specimen grids (300 meshes) with formvar/carbon purchased from Beijing XXBR Technology Co.. Deionized (DI) water (resistance  $> 18.2 \text{ M}\Omega\cdot\text{cm}^{-1}$ ) was used in all of our experiments.

Transmission electron microscopy (TEM) images were taken from a JEM-1400 transmission electron microscopy (JEOL) operated at 100 kV.

**The synthesis of hollow silica nanostructure with small size of Au NPs:** 4 mg of CTAB was dissolved in 2 mL DI water and 14  $\mu\text{L}$  of NaOH (2M) was added to the solution. It was stirred at  $80^\circ\text{C}$ . After 1min, 200  $\mu\text{L}$  TMB was added to the solution in one shot. Followed by 20  $\mu\text{L}$  TEOS and 20  $\mu\text{L}$  APTMS were added to the solution at the same time in 1 minute. 50  $\mu\text{L}$   $\text{HAuCl}_4$  (100 mg/ mL) was added in 5 minutes and 100  $\mu\text{L}$   $\text{NaBH}_4$  (2.5 mg) was added in 30 minutes. The solution was stirred at  $80^\circ\text{C}$  for 2 hours.

**The catalytic reduction of 4-nitrophenol:**  $\text{NaBH}_4$  (50  $\mu\text{L}$ , 0.3M) aqueous solution was added to the solution of 4-nitrophenol (450  $\mu\text{L}$ , 0.96 mM), and the solution was degassed. Then, the above solution was transferred in a 0.5 mL quartz cuvette containing Au nanoparticles ( $1.676 \times 10^{-6} \text{ mmol}$ ). At room temperature, the process of the catalytic reaction was monitored by UV-vis spectroscopy recording a spectrum every 2 min.

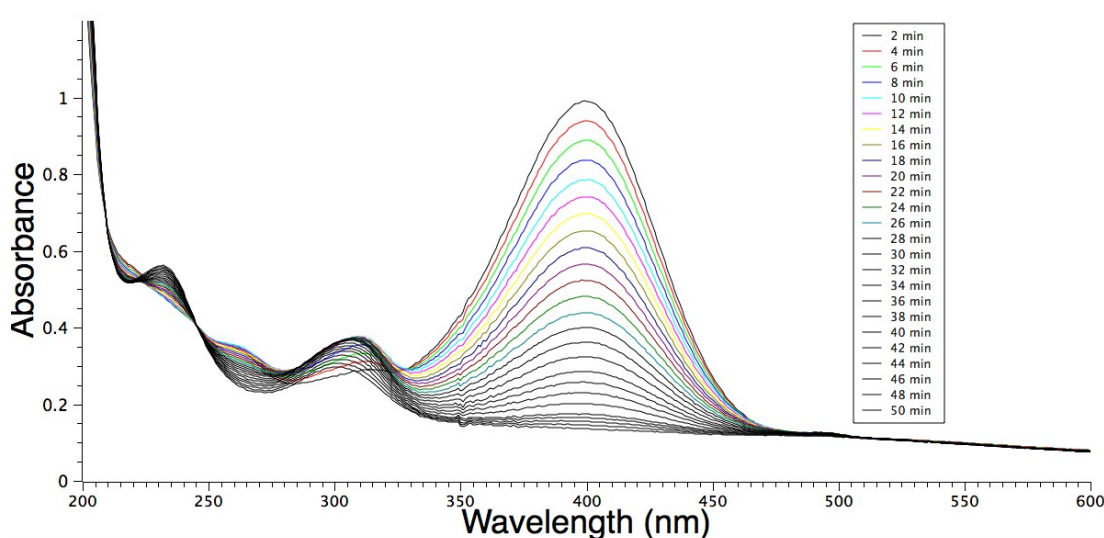

**Figure S-1.** The UV spectrum of the reduction reaction of 4-nitrophenol to 4-aminophenol by using Au / solid silica nanostructures as a catalyst.

**Table S-1** The table of the turnover frequency (TOF) in the reduction of 4-nitrophenol as reported in the literature

|         | This work<br>(Hollow) | This work<br>(Au/Solid silica) | Chem.Comm<br>. 2012, 1108 | Angew. Chem.<br>Int. Ed. 2008,<br>8924. | Inorg. Chem.<br>2011, 50, 8038 | J. Phys. Chem.<br>C 2007, 111, 4596 | Adv. Mater.<br>2014, 26, 4151 |
|---------|-----------------------|--------------------------------|---------------------------|-----------------------------------------|--------------------------------|-------------------------------------|-------------------------------|
| TOF(/s) | 0.09                  | 0.03                           | 0.03                      | 0.02                                    | 0.07                           | 0.02                                | 0.09                          |

The TOF is defined as the number of moles of reduced 4-nitrophenol per mole Au nanoparticles per second. It was based on the total amount of Au in the system, not the amount of surface atoms.

#### Reference:

1. F. Dong, W. Guo, S. K. Park, C. S. Ha, Chem. Comm. 2012, 48, 1108.
2. J. Ge, Q. Zhang, T. Zhang, Y. Yin, Angew. Chem. Int. Ed. 2008, 47, 8924.
3. I. Biondi, G. b. Laurenczy, P. J. Dyson, Inorg. Chem. 2011, 50, 8038;
4. S. Panigrahi, S. Basu, S. Praharaj, S. Pande, S. Jana, A. Pal, S. K. Ghosh, T. Pal, J. Phys. Chem. C 2007, 111, 4596.
5. J. He, W. Ji, L. Yao, Y. Wang, B. Khezri, R. D. Webster, H. Chen, Adv. Mater. 2014, 26, 4151–4155.
